# Supplementary material for: Antifungal and Antibiofilm Activity of Cyclic Temporin L Peptide Analogues against Albicans and Non-Albicans Candida Species
Source: MDPI journal article supplement (doi:10.3390/pharmaceutics14020454), 2022-02-21
Supplement: s1 [file s1]

# Supplementary Materials: Antifungal and Antibiofilm Activity of Cyclic Temporin L Peptide Analogues against Albicans and Non-Albicans *Candida* Species

Rosa Bellavita, Angela Maione, Francesco Merlino, Antonietta Siciliano, Principia Dardano, Luca De Stefano, Stefania Galdiero, Emilia Galdiero, Paolo Grieco and Annarita Falanga

## Table of contents

|                                                                |    |
|----------------------------------------------------------------|----|
| 1. Analytical data of peptides 3, 7, 15 and 16 (Table S1)      | S2 |
| 2. HPLC chromatograms of peptides 3,7, 15 and 16 (Figure S1–4) | S2 |

**Table S1.** Analytical data for peptides 3, 7, 15 and 16.

| ID | t <sub>R</sub> (min) | Molecular formula                                                                            | [M+H] <sup>+</sup> <sub>calcd</sub> | [M+2H] <sup>+</sup> /2 <sub>obs</sub> |
|----|----------------------|----------------------------------------------------------------------------------------------|-------------------------------------|---------------------------------------|
| 3  | 13.9                 | C <sub>89</sub> H <sub>131</sub> N <sub>20</sub> O <sub>14</sub> <sup>+</sup>                | 1704.0148                           | 853.0122                              |
| 7  | 11.3                 | C <sub>79</sub> H <sub>117</sub> N <sub>22</sub> O <sub>14</sub> <sup>+</sup>                | 1597.9114                           | 799.9601                              |
| 15 | 13.9                 | C <sub>89</sub> H <sub>131</sub> N <sub>20</sub> O <sub>14</sub> <sup>+</sup>                | 1704.0148                           | 853.0122                              |
| 16 | 14.2                 | C <sub>84</sub> H <sub>122</sub> N <sub>19</sub> O <sub>13</sub> S <sub>2</sub> <sup>+</sup> | 1668.8905                           | 835.8973                              |

## 2. HPLC chromatograms of peptides 3,7, 15 and 16

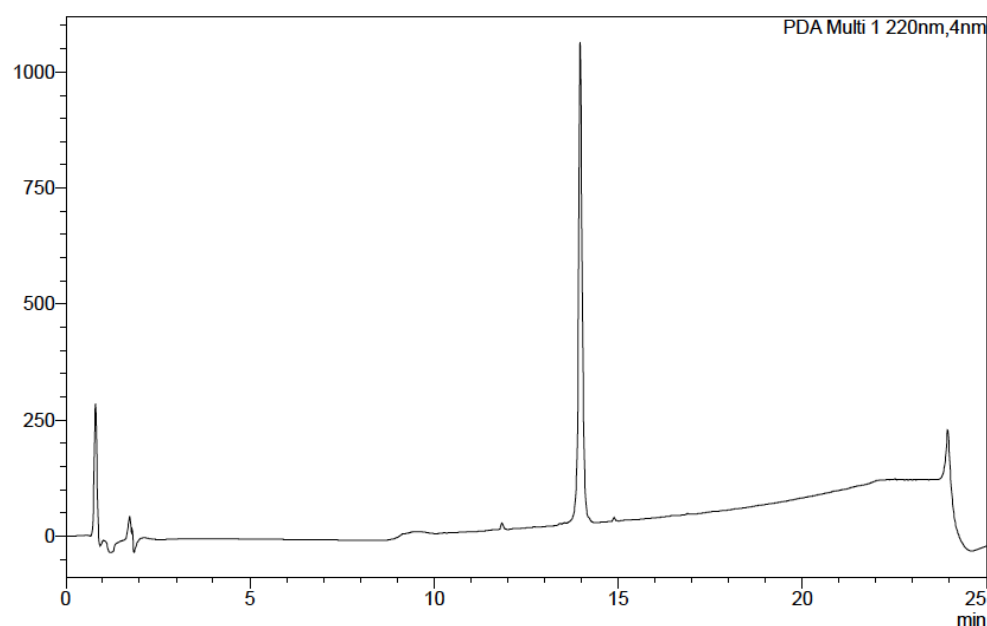

**Figure S1.** Chromatogram of lactam-bridged peptide 3 obtained by an analytical HPLC (Shimadzu UFLC SPD-M20A/DGU-20A3R/LC-20AD) equipped with a Phenomenex Kinetex C18 column (150 mm × 4.6 mm, 5 μm, 100 Å), and monitored by UV detection at 220 nm. t<sub>R</sub>: 13.9 min [linear gradient 10-90% MeCN (0.1% TFA) in H<sub>2</sub>O (0.1% TFA) over 20 min, flow rate of 1 mL/min].

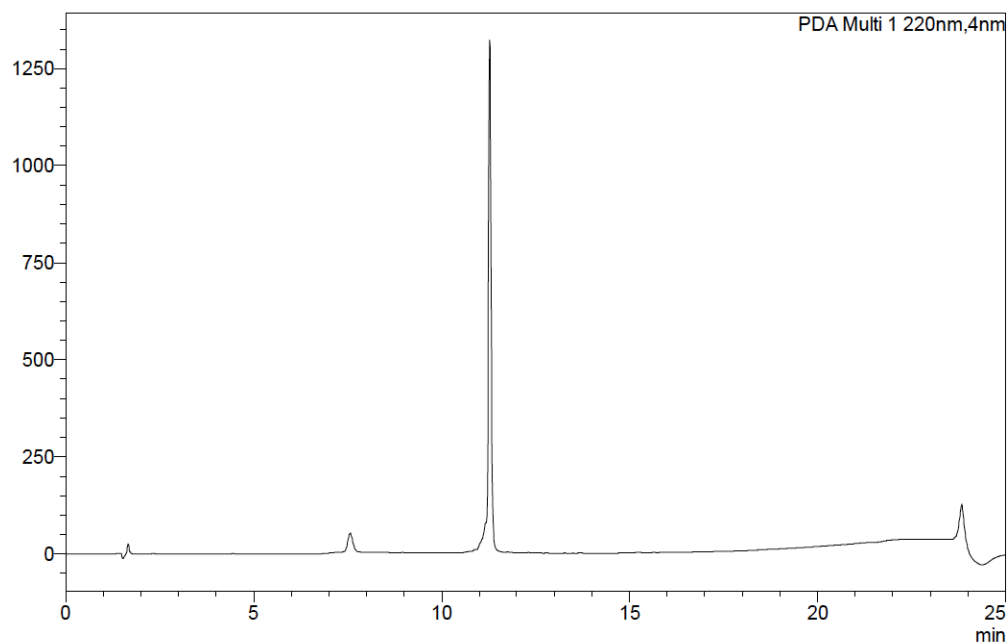

**Figure S2.** Chromatogram of 1,4-triazolic- bridged peptide **7** obtained by an analytical HPLC (Shimadzu UFLC SPD-M20A/DGU-20A3R/LC-20AD) equipped with a Phenomenex Kinetex C18 column (150 mm  $\times$  4.6 mm, 5  $\mu$ m, 100 Å), and monitored by UV detection at 220 nm.  $t_R$ : 11.3 min [linear gradient 10–90% MeCN (0.1% TFA) in H<sub>2</sub>O (0.1% TFA) over 20 min, flow rate of 1 mL/min].

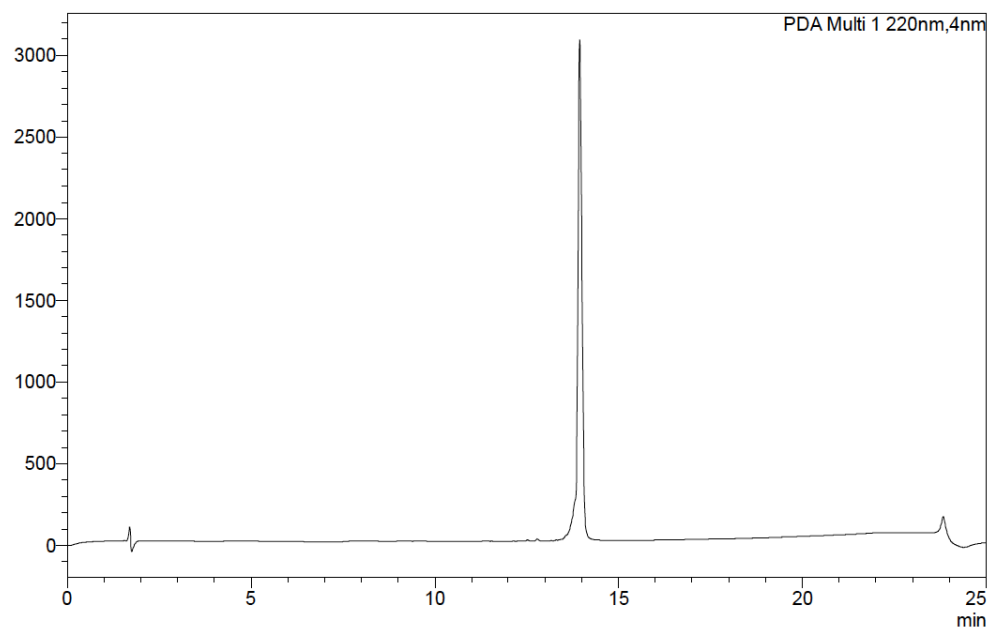

**Figure S3.** Chromatogram of lactam-bridged peptide **15** obtained by an analytical HPLC (Shimadzu UFLC SPD-M20A/DGU-20A3R/LC-20AD) equipped with a Phenomenex Kinetex C18 column (150 mm  $\times$  4.6 mm, 5  $\mu$ m, 100 Å), and monitored by UV detection at 220 nm.  $t_R$ : 13.9 min [linear gradient 10–90% MeCN (0.1% TFA) in H<sub>2</sub>O (0.1% TFA) over 20 min, flow rate of 1 mL/min].

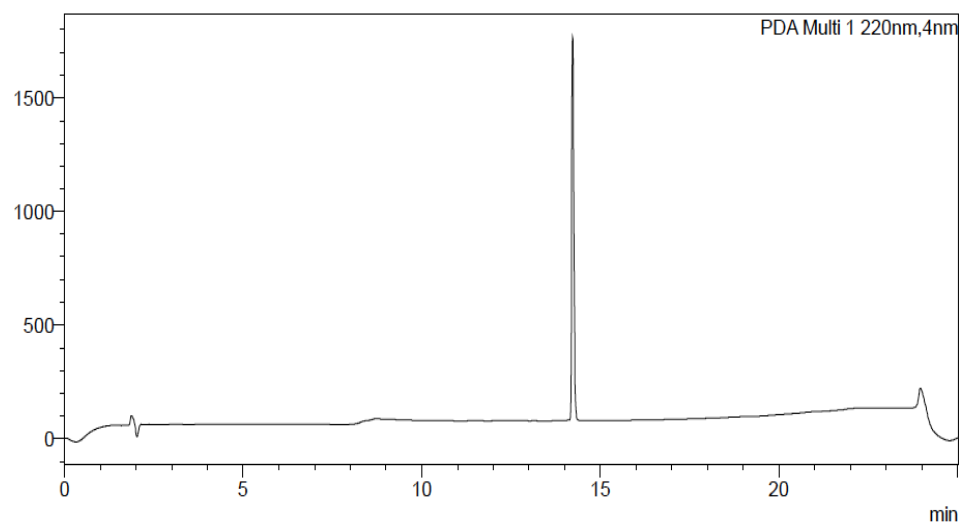

**Figure S4.** Chromatogram of disulfide-bridged peptide **16** obtained by an analytical HPLC (Shimadzu UFLC SPD-M20A/DGU-20A3R/LC-20AD) equipped with a Phenomenex Kinetex C18 column (150 mm  $\times$  4.6 mm, 5  $\mu$ m, 100  $\text{\AA}$ ), and monitored by UV detection at 220 nm.  $t_R$ : 14.2 min [linear gradient 10–90% MeCN (0.1% TFA) in H<sub>2</sub>O (0.1% TFA) over 20 min, flow rate of 1 mL/min].
